# Supplementary material for: An extension of WeatherBench 2 to binary hydroclimatic forecasts
Source: Copernicus journal article supplement (doi:10.5194/gmd-18-5781-2025), 2025-09-08
Supplement: Supplementary file 1 [file gmd-18-5781-2025-supplement.pdf]

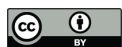

*Supplement of*

## **An extension of WeatherBench 2 to binary hydroclimatic forecasts**

**Tongtiegang Zhao et al.**

*Correspondence to:* Tongtiegang Zhao (zhaottg@mail.sysu.edu.cn) and Qiang Li (liqiang65@mail2.sysu.edu.cn)

The copyright of individual parts of the supplement might differ from the article licence.

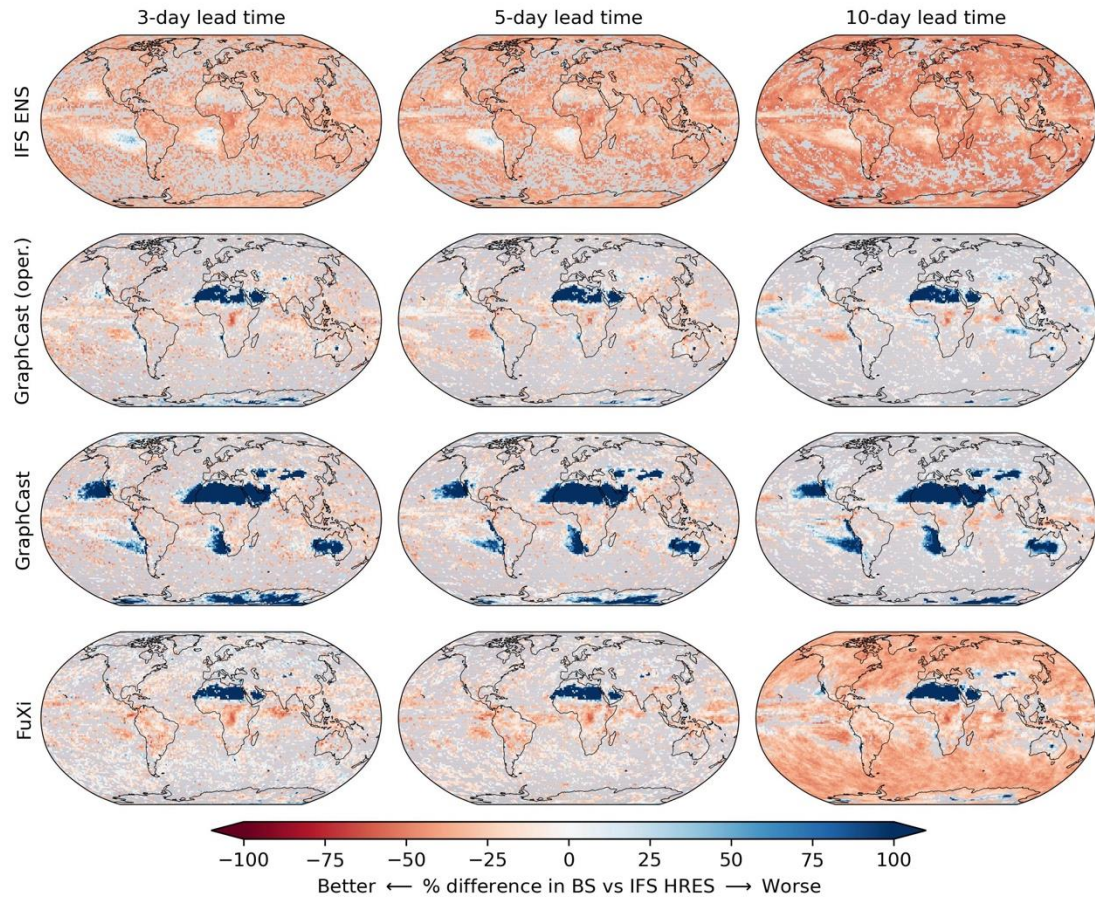

**Figure S1.** As for Figure 4, but for Brier score (BS).

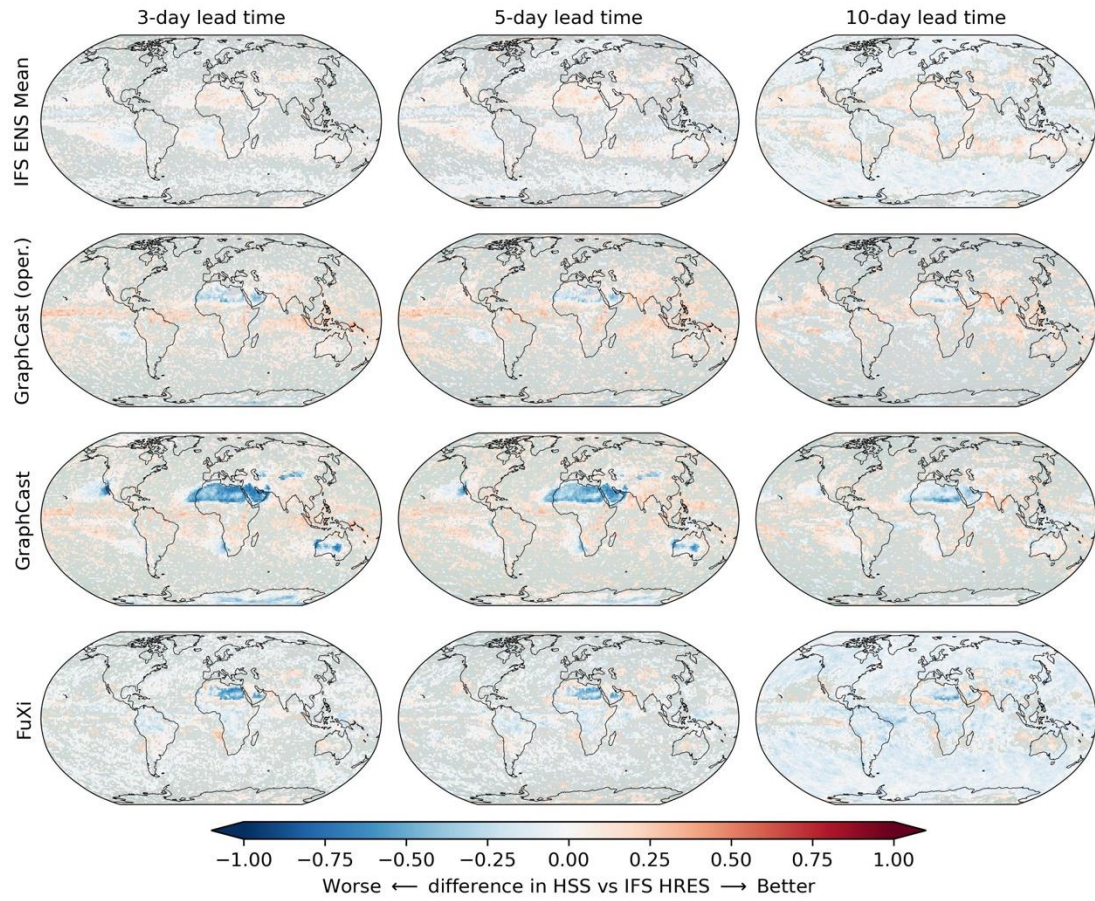

**Figure S2.** As for Figure 4, but for the Heidke skill score (HSS).



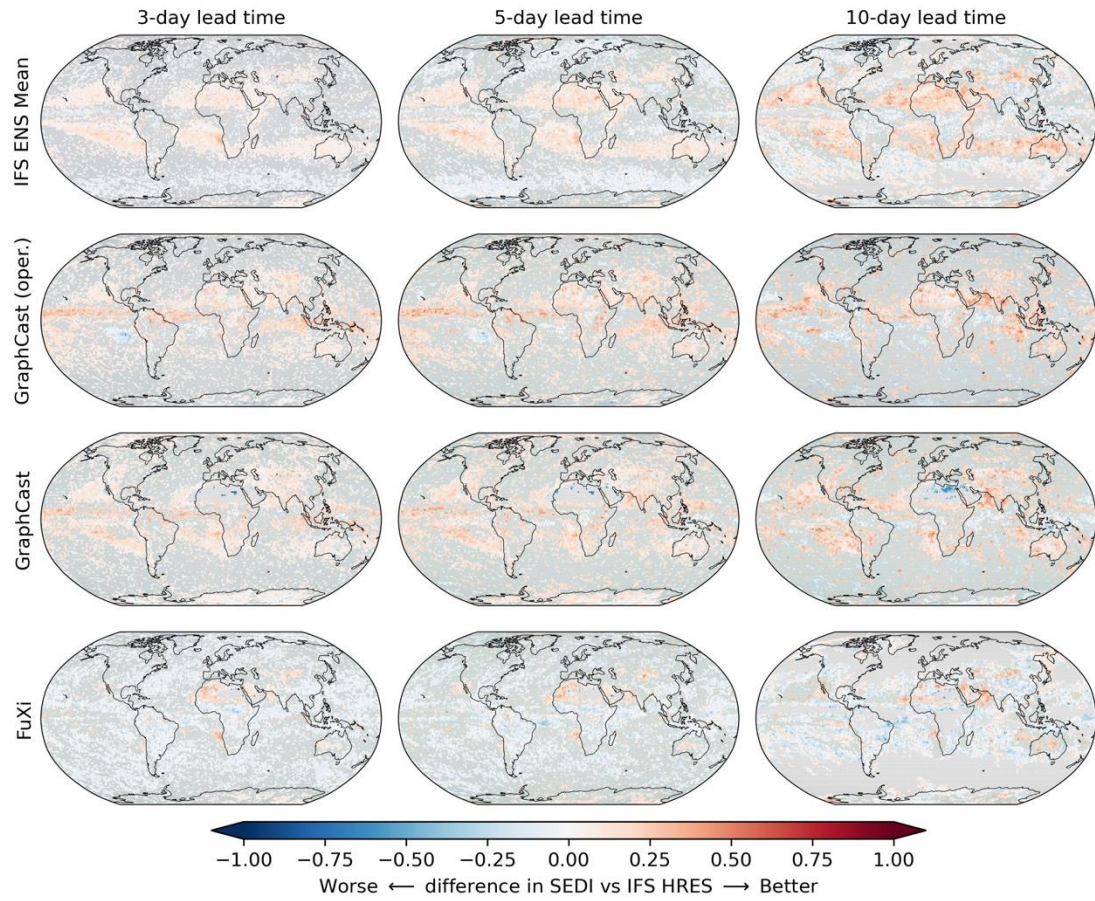

**Figure S3.** As for Figure 4, but for the symmetric extremal dependence index (SEDI).

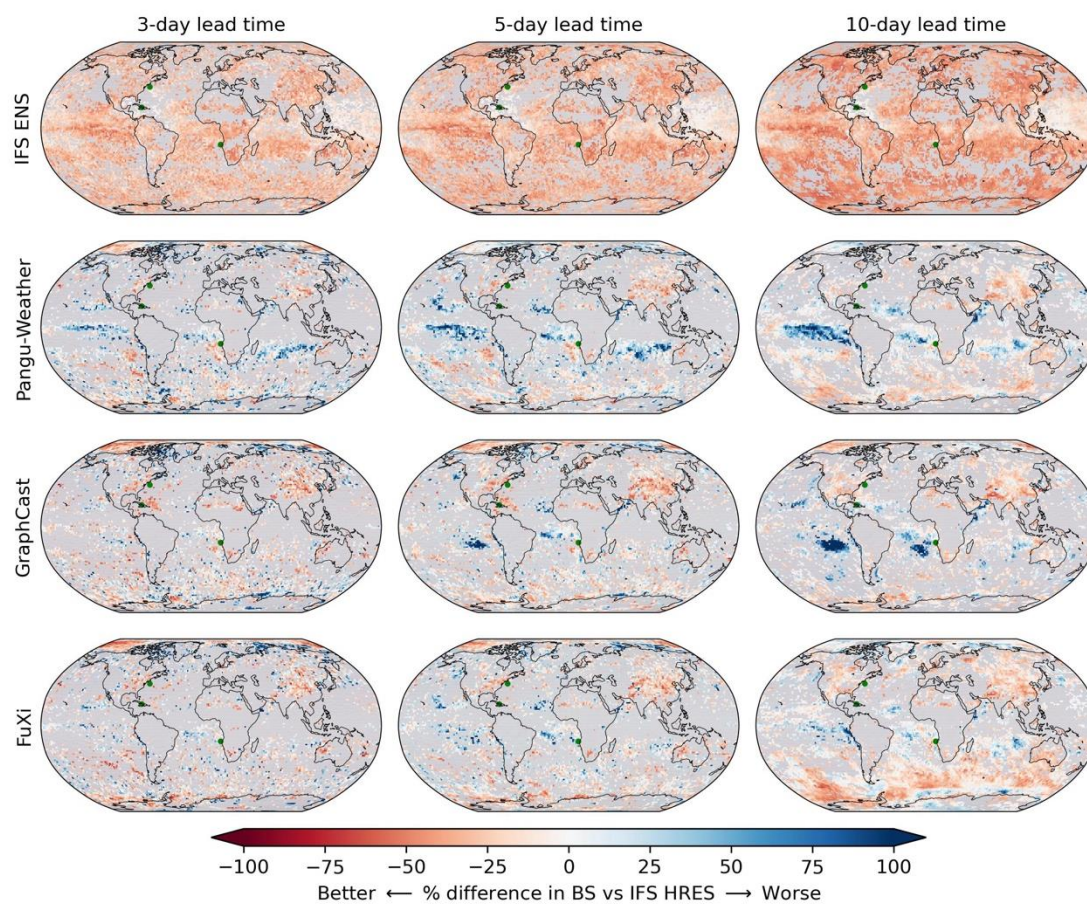

**Figure S4.** As for Figure 6, but for Brier score (BS).



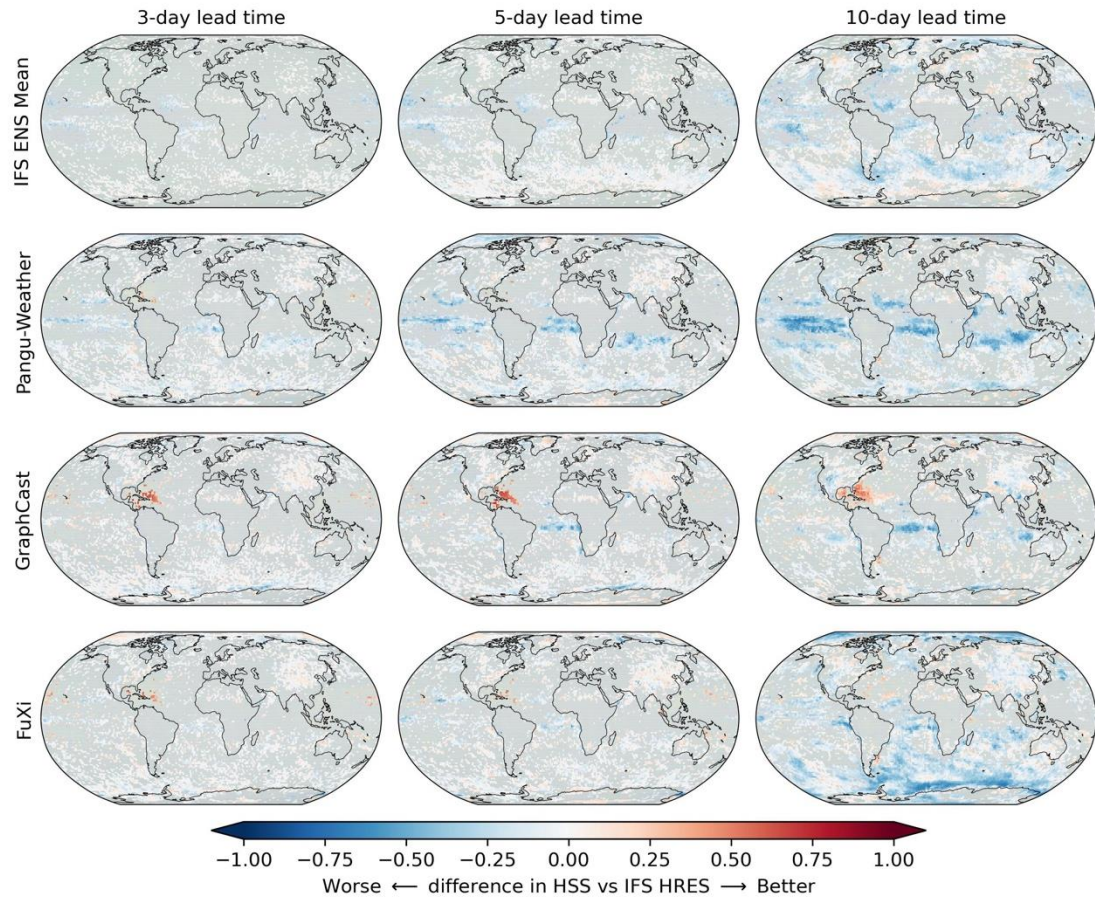

**Figure S5.** As for Figure 6, but for the Heidke skill score (HSS).

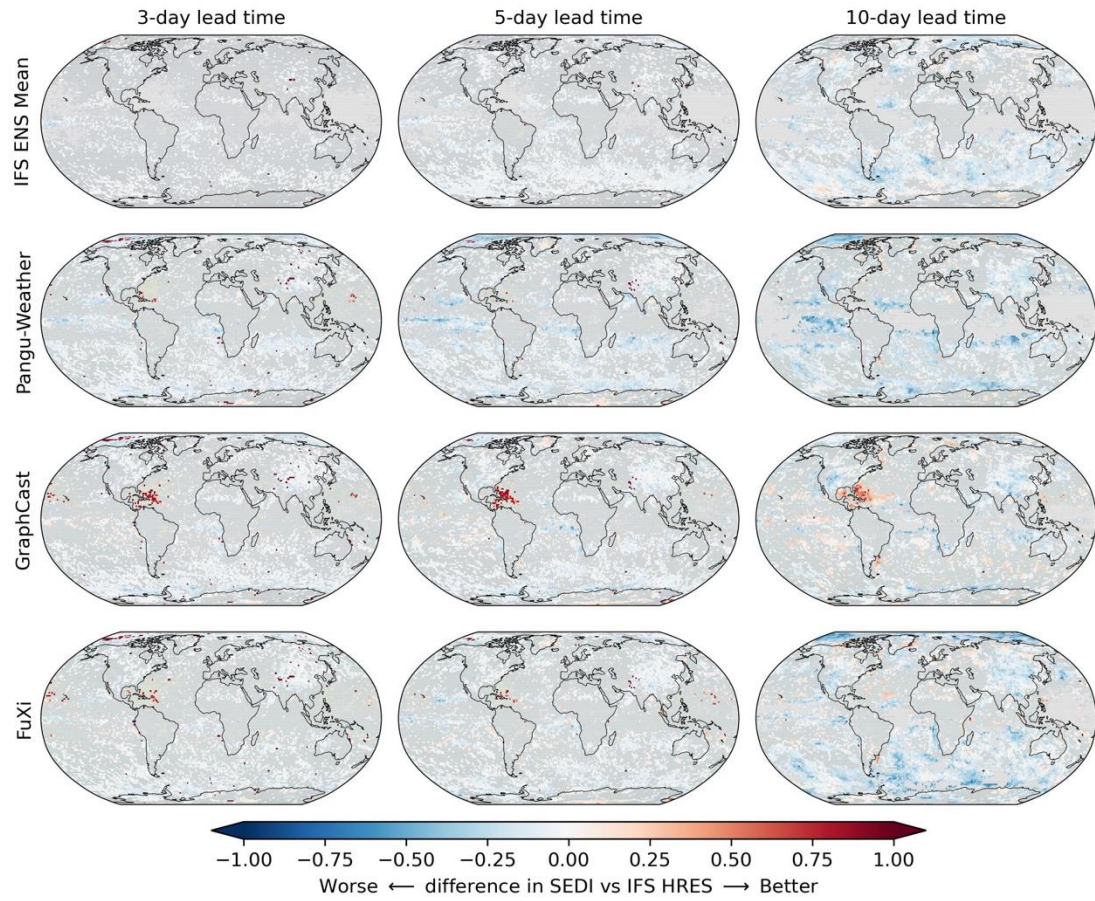

**Figure S6.** As for Figure 6, but for the symmetric extremal dependence index (SEDI).
